# Supplementary material for: The simple, template free synthesis of a Bi2S3–ZnO heterostructure and its superior photocatalytic activity under UV-A light
Source: Royal Society of Chemistry journal article supplement (doi:10.1039/c3dt33117b), 2013-01-01
Supplement: c3dt33117b.pdf [file c3dt33117b.pdf]

## Supporting Informations

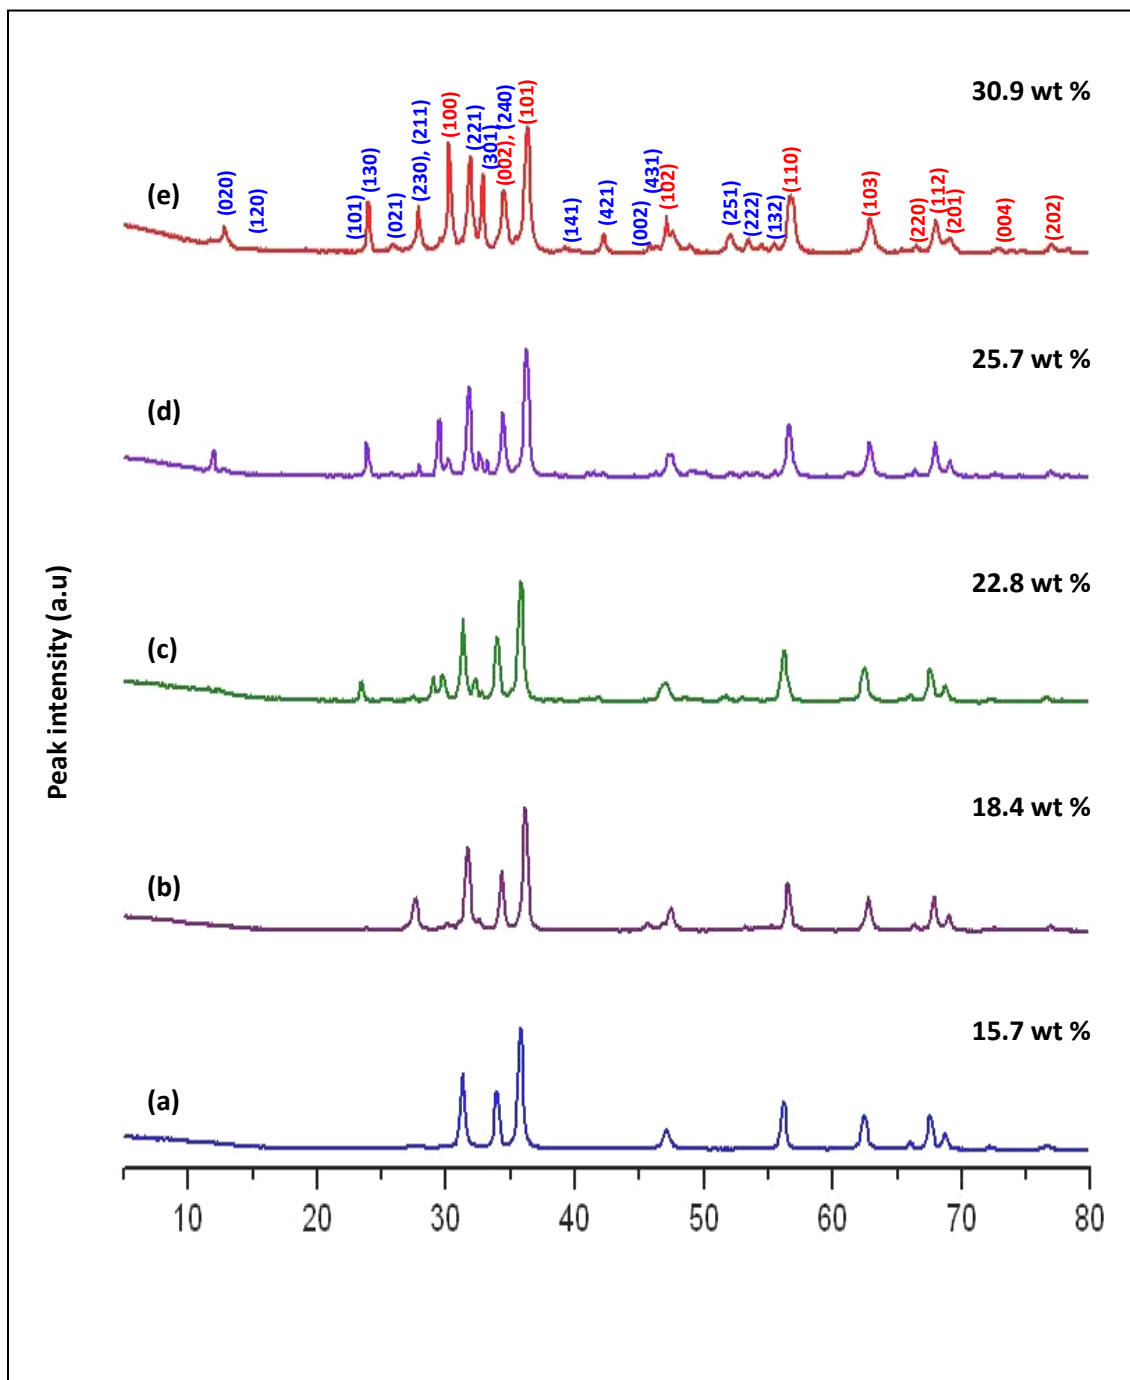

**Fig. S1** XRD pattern of various percentage Bi<sub>2</sub>S<sub>3</sub>-ZnO (a) 15.7wt%,  
(b) 18.4wt%, (c) 22.8wt%, (d) 25.7wt% and (e) 30.9wt%

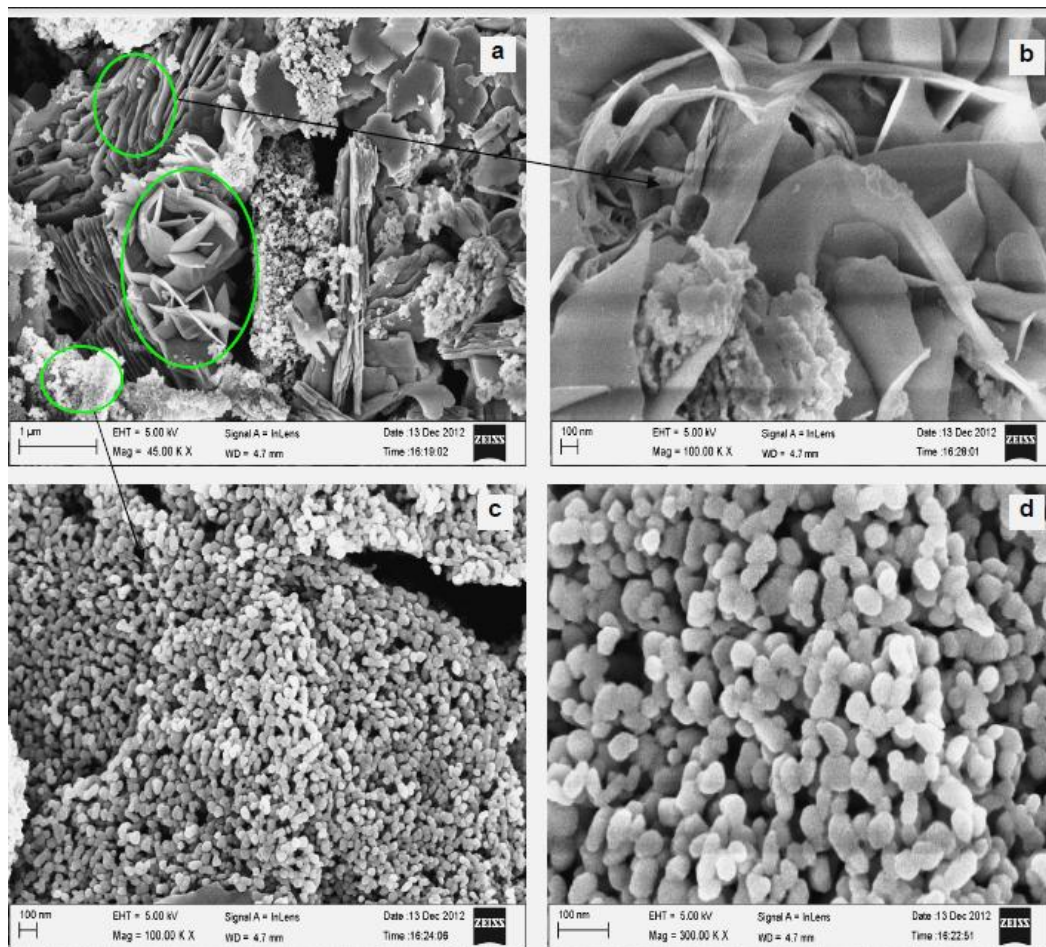

**Fig. S2** FE-SEM images of 25.7wt% Bi<sub>2</sub>S<sub>3</sub>-ZnO at two magnifications (a) 1 μm, (b) 100 nm, (c) 100 nm and (d) 100 nm

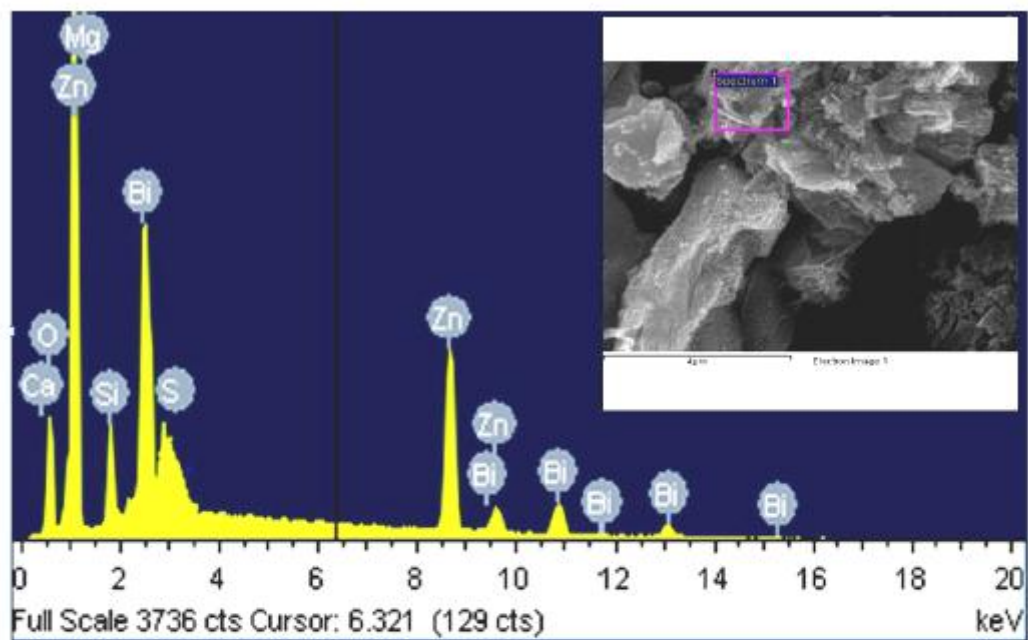

| Element | Weight% | Atomic% |
|---------|---------|---------|
| O K     | 15.38   | 48.12   |
| Mg K    | 0.37    | 0.75    |
| Si K    | 0.53    | 0.99    |
| S K     | 3.53    | 6.29    |
| Ca K    | 1.32    | 1.65    |
| Zn K    | 45.38   | 34.23   |
| Bi M    | 33.49   | 8.02    |
| Totals  | 100.00  |         |

**Fig. S3** EDS analysis of 25.7wt% Bi<sub>2</sub>S<sub>3</sub>-ZnO

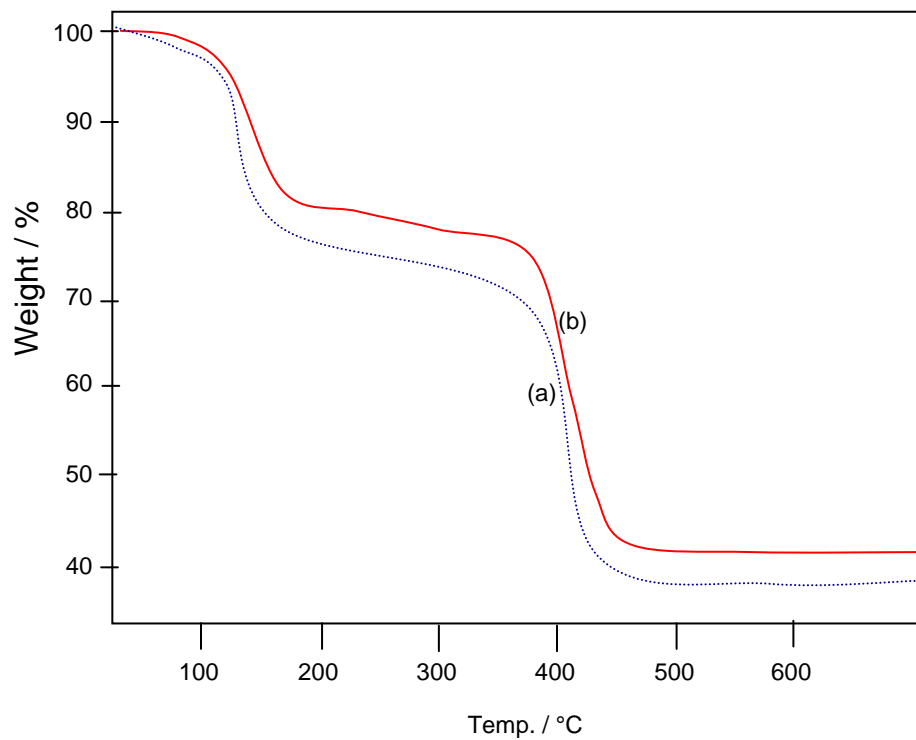

**Fig. S4** Thermal Gravimetric Analysis (a) Zinc oxalate and (b) Mixed precipitate of Bismuth sulfide - Zinc oxalate

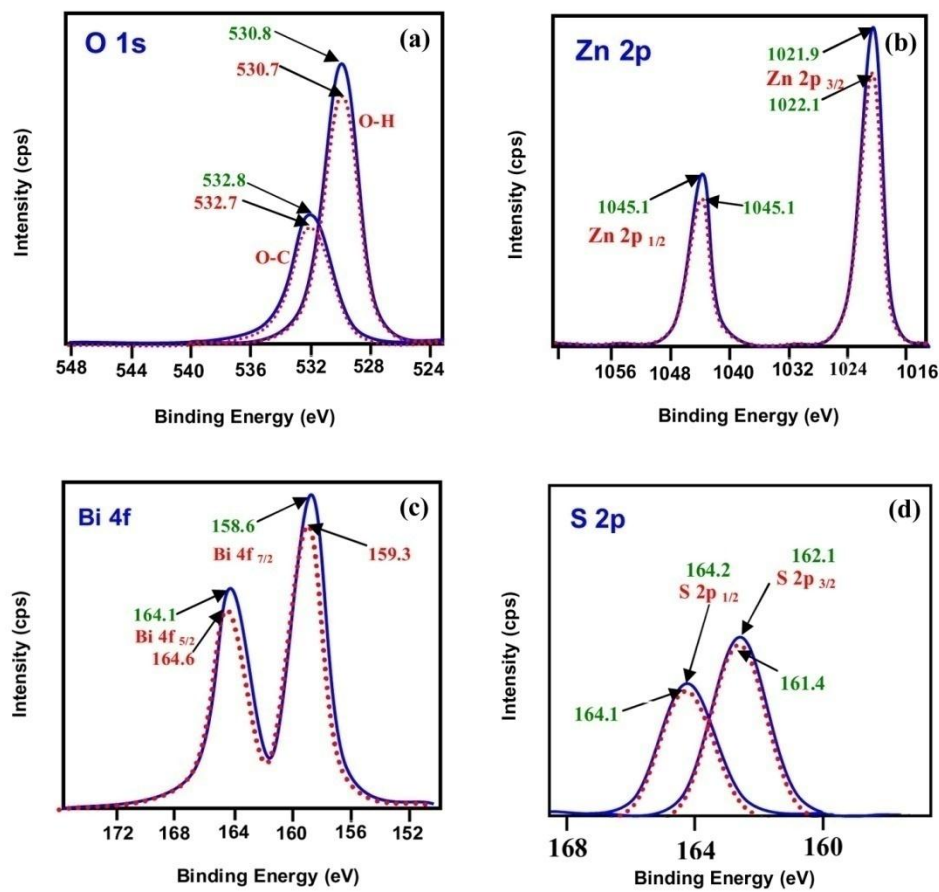

**Fig .S5** XPS analysis of  $\text{Bi}_2\text{S}_3\text{-ZnO}$  (a)O 1s , (b) Zn 2p, (c) Bi 4f and (d) S 2p

— Fresh  $\text{Bi}_2\text{S}_3\text{-ZnO}$ , .....  $\text{Bi}_2\text{S}_3\text{-ZnO}$  after fifth cycle

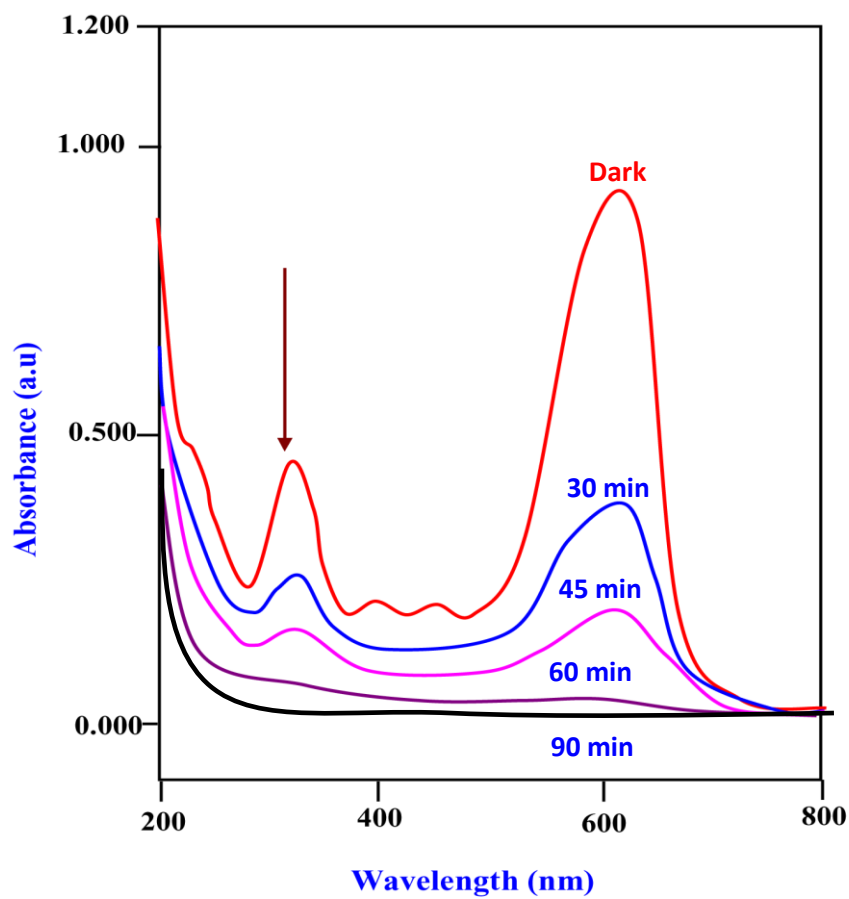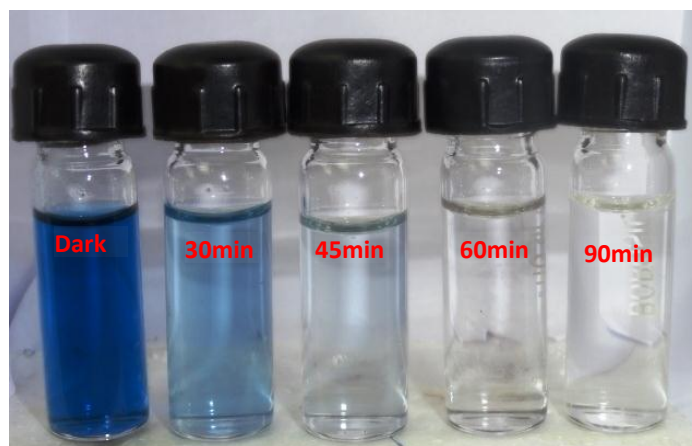

**Fig .S6** UV spectral changes of AB 1 at different irradiation times with Bi<sub>2</sub>S<sub>3</sub>-ZnO

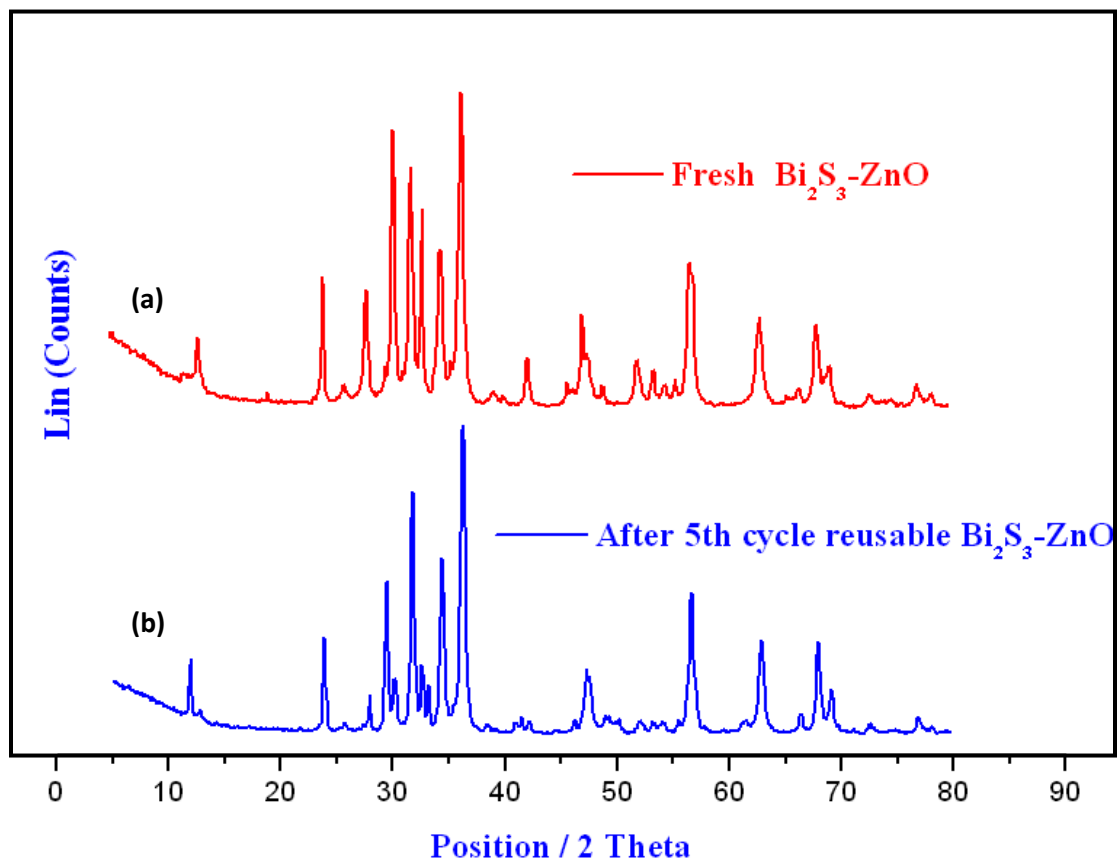

**Fig. S7** XRD pattern of (a) Fresh Bi<sub>2</sub>S<sub>3</sub>-ZnO and (b) After fifth cycle reusable

Bi<sub>2</sub>S<sub>3</sub>-ZnO
